# Supplementary material
Source: MDPI journal article supplement (https://www.mdpi.com/2073-4344/11/10/1171)
Supplement: s1 [file s1]

## Supplementary Material

# Insights into the nature of the active sites of Pt-WO<sub>x</sub>/Al<sub>2</sub>O<sub>3</sub> catalysts for the glycerol hydrogenolysis into 1,3-propanediol

Clara Jarauta-Córdoba <sup>1</sup>, Mikel Oregui Bengoechea <sup>2</sup>, Iker Aguirrezabal-Telleria <sup>2</sup>, Pedro Luis Arias <sup>2</sup> and Inaki Gandarias <sup>2,\*</sup>

- <sup>1</sup> Centro de Investigación de Recursos y Consumos Energéticos, Zaragoza, Spain, Spain; [cajarauta@fcirce.es](mailto:cajarauta@fcirce.es)
- <sup>2</sup> Department of Chemical and Environmental Engineering, School of Engineering, University of the Basque Country (UPV/EHU), Bilbao, Spain; [mikel.oregui@ehu.eus](mailto:mikel.oregui@ehu.eus) (MOB); [iker.aguirrezabal@ehu.eus](mailto:iker.aguirrezabal@ehu.eus) (IAT); [pedroluis.arias@ehu.eus](mailto:pedroluis.arias@ehu.eus) (PLA)
- \* Correspondence: [inaki.gandarias@ehu.eus](mailto:inaki.gandarias@ehu.eus); Tel.: +34 94 6017373

| Contents   | Page |
|------------|------|
| 1. Figures | 2    |
| 2. Tables  | 4    |

## 1 Figures

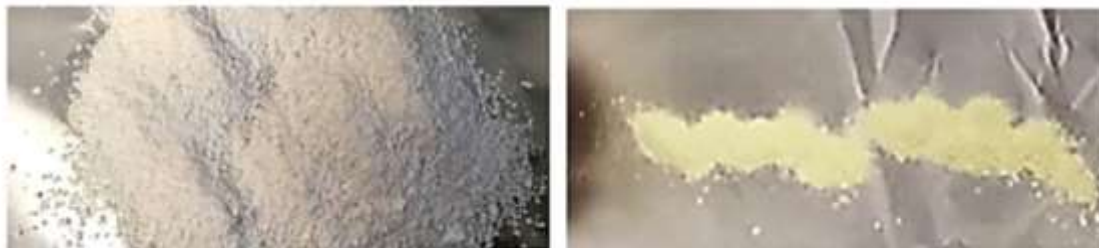

**Figure S1.** Visual identification of bulk  $\text{WO}_3$  crystallites (of yellow color) on the  $15\text{W}/\gamma\text{-Al}_2\text{O}_3$  material (right). The  $10\text{W}/\gamma\text{-Al}_2\text{O}_3$  material (left) is shown for comparison.

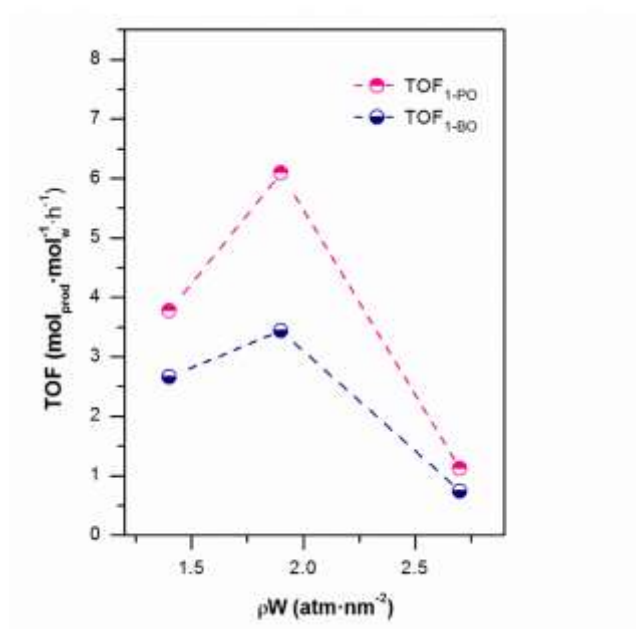

**Figure S2.** Correlation between  $\text{TOF}_{\text{product-W}}$  and tungsten surface density for  $5\text{Pt}^{\text{PH}10}\text{yW}^*$  catalysts. 1-propanol (1-PO) and 1-butanol (1-BO) are the products obtained after the hydrogenolysis of the secondary hydroxyl group, when 1,2-propanediol (1,2-PDO) or 1,2-butanediol (1,2-BDO) are used as substrate.

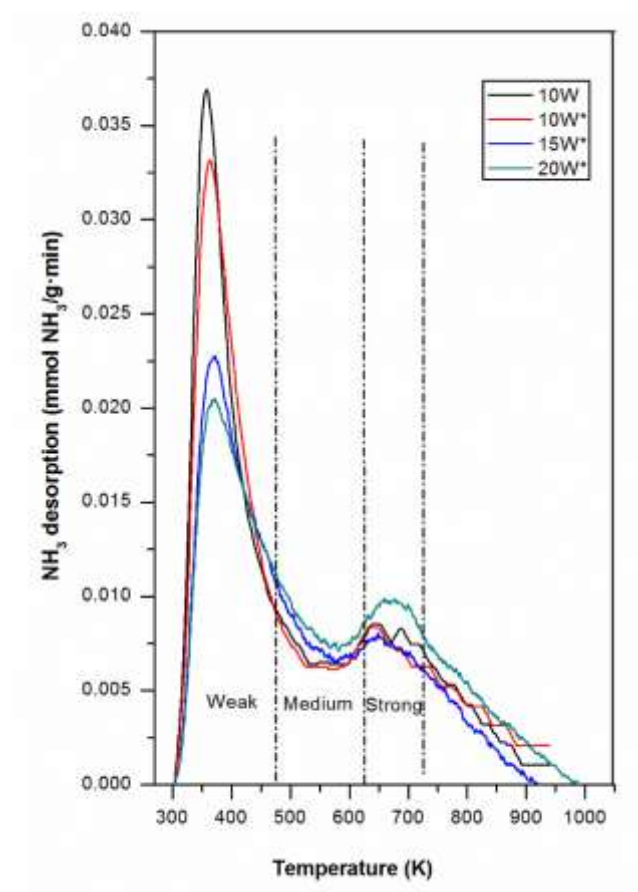

**Figure S3.** TPD-NH<sub>3</sub> profiles for different tungsten oxide  $\gamma$ -Al<sub>2</sub>O<sub>3</sub> materials.

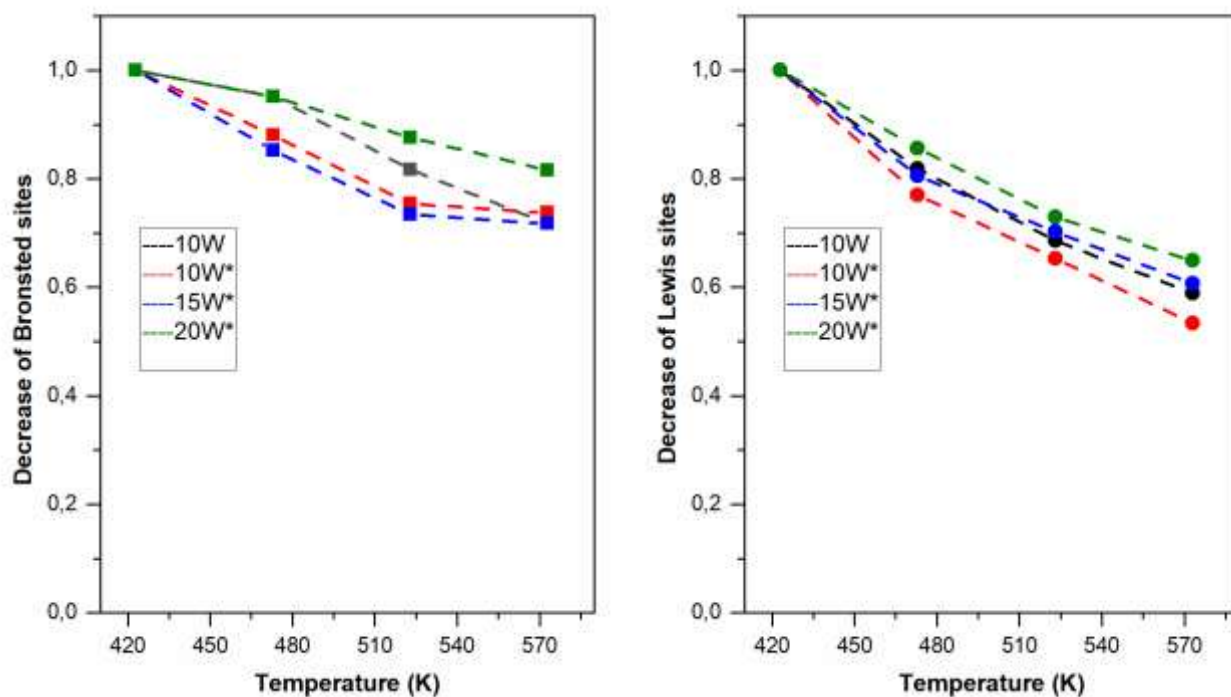

**Figure S4.** Fraction of Brønsted sites (left) and Lewis sites (right) remaining in the surface of the catalyst as a function of the vacuum treatment temperature.

## 2 Tables

**Table S1.** Ratio between the H<sub>2</sub> consumption in peaks related to the PtO reduction (peaks 1,2 and 3 from Figure 1) and the theoretical H<sub>2</sub> consumption to reduce all the PtO present in the catalyst to Pt<sup>0</sup>.

| Catalyst<br>/ $\gamma$ -Al <sub>2</sub> O <sub>3</sub> | <i>TPR H<sub>2</sub> Consumption</i>        |  |
|--------------------------------------------------------|---------------------------------------------|--|
|                                                        | <i>H<sub>2</sub>Theoretical Consumption</i> |  |
| 5Pt <sup>pH4</sup> 10W                                 | 1.30                                        |  |
| 5Pt <sup>pH6</sup> 10W                                 | 1.13                                        |  |
| 5Pt <sup>pH8</sup> 10W                                 | 1.79                                        |  |
| 5Pt <sup>pH10</sup> 10W                                | 1.32                                        |  |
| 5Pt <sup>pH10</sup> 10W*                               | 1.05                                        |  |
| 5Pt <sup>pH10</sup> 10W*                               | 0.97                                        |  |
| 5Pt <sup>pH10</sup> 10W*                               | 0.95                                        |  |

**Table S2.** Total acidity (measured by TPD-NH<sub>3</sub>), and Brønsted to Lewis ratio (measured by FTIR of adsorbed pyridine after vacuum treatment at different temperatures) of supported tungsten oxide materials.

| Material<br>/ $\gamma$ -Al <sub>2</sub> O <sub>3</sub> | TPD-NH <sub>3</sub><br>(mmol NH <sub>3</sub> /g) |                     |                       |                      | FTIR Pyridine<br>Brønsted/Lewis (B/L) ratio |            |            |            |
|--------------------------------------------------------|--------------------------------------------------|---------------------|-----------------------|----------------------|---------------------------------------------|------------|------------|------------|
|                                                        | Total<br>acidity                                 | weak<br>(353-473 K) | medium<br>(473-623 K) | strong<br>(623-723K) | 423<br>(K)                                  | 473<br>(K) | 523<br>(K) | 573<br>(K) |
| 10W                                                    | 1.046                                            | 0.674               | 0.209                 | 0.162                | 0.043                                       | 0.050      | 0.051      | 0.052      |
| 10W*                                                   | 1.007                                            | 0.657               | 0.202                 | 0.148                | 0.058                                       | 0.078      | 0.102      | 0.130      |
| 15W*                                                   | 0.874                                            | 0.513               | 0.220                 | 0.141                | 0.078                                       | 0.082      | 0.081      | 0.092      |
| 20W*                                                   | 0.922                                            | 0.485               | 0.254                 | 0.184                | 0.246                                       | 0.274      | 0.294      | 0.310      |

**Table S3.** Textural properties and tungsten surface density of different supported tungsten oxide materials.

| <b>Material</b><br><b>/<math>\gamma</math>-Al<sub>2</sub>O<sub>3</sub></b> | <b>S<sub>BET</sub></b><br><b>(m<sup>2</sup>/g)</b> | <b>V<sub>pore</sub></b><br><b>(cm<sup>3</sup>/g)</b> | <b><math>\rho_W</math></b><br><b>(at<sub>W</sub>·nm<sup>-2</sup>)</b> |
|----------------------------------------------------------------------------|----------------------------------------------------|------------------------------------------------------|-----------------------------------------------------------------------|
| <b>10W</b>                                                                 | 216                                                | 0.63                                                 | 1.28                                                                  |
| <b>10W*</b>                                                                | 212                                                | 0.60                                                 | 1.39                                                                  |
| <b>15W*</b>                                                                | 214                                                | 0.59                                                 | 1.93                                                                  |
| <b>20W*</b>                                                                | 176                                                | 0.50                                                 | 2.71                                                                  |
